# Supplementary material for: Policy threshold for decelerating chronic disease accumulation among older Chinese adults: Evidence from the Healthy China 2030 Initiative
Source: Research Square preprint supplement (doi:10.21203/rs.3.rs-8189460/v1), 2025-12-22
Supplement: Supplementary file 1 [file c8524681a958a56716e96719.docx]

Appendix I

**Table S1.** Descriptive Statistics of All the Variables used in the Analysis (N=8337).

| **Variable** | **N** | **Mean/n (%)** | **SD** | **Missing n(%)** |
| --- | --- | --- | --- | --- |
| Outcome Variable |  |  |  |  |
| Δ Chronic conditions | 7922 | 0.45 | 1.29 | 415 (5.0%) |
| Time Variables |  |  |  |  |
| Time in months (TML) | 8337 | 16.09 | 3.73 | 0 (0.0%) |
| TML category, n (%) | 8337 | - | - | 0 (0.0%) |
| Low (<= 25%) | 8337 | 2211 (26.5%) | - | - |
| Medium (>25%, <=75%) | 8337 | 4972 (59.6%) | - | - |
| High (> 75%) | 8337 | 1154 (13.8%) | - | - |
| Demographic Variables |  |  |  |  |
| Age (years) | 8337 | 67.98 | 6.67 | 0 (0.0%) |
| Age category, n (%) | 8337 | - | - | 0 (0.0%) |
| 60-64 | 8337 | 3181 (38.2%) | - | - |
| 65-69 | 8337 | 2279 (27.3%) | - | - |
| 70-74 | 8337 | 1444 (17.3%) | - | - |
| 75-79 | 8337 | 865 (10.4%) | - | - |
| 80+ | 8337 | 568 (6.8%) | - | - |
| Male, n (%) | 8337 | 4032 (48.4%) | - | 0 (0.0%) |
| Low education, n (%) | 8337 | 6629 (79.5%) | - | 0 (0.0%) |
| Couple Household, n (%) | 8337 | 6552 (78.6%) | - | 0 (0.0%) |
| Rural residence, n (%) | 7700 | 5967 (77.5%) | - | 637 (7.6%) |
| Socioeconomic Variables |  |  |  |  |
| Per capita income in USD | 8337 | 2880.52 | 779.25 | 0 (0.0%) |
| GDP per capita in USD | 8337 | 6605.27 | 2232.5 | 0 (0.0%) |
| Hospital beds per 1000 | 8337 | 5.14 | 0.59 | 0 (0.0%) |
| Physicians per 1000 | 8337 | 2.17 | 0.31 | 0 (0.0%) |
| Disability Components |  |  |  |  |
| ADLs count | 8301 | 0.54 | 1.15 | 36 (0.4%) |
| IADLs count | 8306 | 0.61 | 1.11 | 31 (0.4%) |
| Upper limb disability | 8300 | 0.38 | 0.71 | 37 (0.4%) |
| Lower limb disability | 8300 | 1.31 | 1.31 | 37 (0.4%) |
| Mental Health Components |  |  |  |  |
| Self-rated health, n (%) | 7926 | - | - | 411 (4.9%) |
| 1.Very good | 7926 | 781 (9.9%) | - | - |
| 2.Good | 7926 | 934 (11.8%) | - | - |
| 3.Fair | 7926 | 4200 (53.0%) | - | - |
| 4.Poor | 7926 | 1581 (19.9%) | - | - |
| 5.Very Poor | 7926 | 430 (5.4%) | - | - |
| Depression score (CESD-10) | 7893 | 8.32 | 6.49 | 444 (5.3%) |
| Self-rated memory, n (%) | 7894 | - | - | 443 (5.3%) |
| 1.Excellent | 7894 | 60 (0.8%) | - | - |
| 2.Very good | 7894 | 333 (4.2%) | - | - |
| 3.Good | 7894 | 579 (7.3%) | - | - |
| 4.Fair | 7894 | 3896 (49.4%) | - | - |
| 5.Poor | 7894 | 3026 (38.3%) | - | - |
| Health and Lifestyle Variables |  |  |  |  |
| Total Wealth in USD (thousand) | 4923 | 36.032 | 257.46 | 3414 (40.9%) |
| Baseline chronic conditions count | 7923 | 2.17 | 1.69 | 414 (5.0%) |
| Cares for ADLs, n (%) | 8300 | 2218 (26.7%) | - | 37 (0.4%) |
| Hospitalization times (past year) | 8290 | 0.25 | 0.7 | 47 (0.6%) |
| Out-of-pocket hospitalization cost | 8147 | 137.41 | 755.22 | 190 (2.3%) |
| Smoking frequency per day | 8230 | 4.14 | 8.91 | 107 (1.3%) |
| Ever Drinking last year, n (%) | 8300 | 2671(32.18%) | - | 61 (0.7%) |
| Insured, n (%) | 7891 | 7126 (90.3%) | - | 446 (5.3%) |

Note: All the statistics are based on original data before multiple imputation. For continuous variables, the means ± SDs are reported. For binary categorical variables, n (%) of the positive/reference category is reported. For multicategory variables, all categories are displayed with the number of observations (n) and percentage (%) for each.

**Table S1A.** Distribution of Changes in Chronic Conditions Count by Policy Exposure Duration Groups.

| **Exposure Group** | **N** | **Decrease (%)** | **No Change (%)** | **Increase (%)** |
| --- | --- | --- | --- | --- |
| Short (≤25th percentile) |  | 16.2 | 41.2 | 42.6 |
| Medium (>25th, ≤75th) |  | 17.2 | 40.9 | 41.9 |
| Long (>75th percentile) |  | 20.0 | 39.3 | 40.7 |
| Overall | 8337 | 17.3 | 40.8 | 41.9 |

Note: N represents weighted observations from 50 multiply imputed datasets with overlap weighting applied. "Decrease" indicates a negative change in chronic conditions (improvement), "No change" indicates a zero change, and "increase" indicates a positive change (deterioration). Exposure groups are defined by quartiles of policy exposure duration in months. Chi-square test: χ²(30) = 1,300, p < 0.001.

**Table S2.** Covariate balance statistics before and after overlap weighting.

| **Variables** | **SMD Before** | **SMD After** | **p value After** |
| --- | --- | --- | --- |
| ADLs | 0.083 | 0.002 | 97.0% |
| Chronic disease count | 0.095 | 0.004 | 96.1% |
| Low education | 0.075 | 0.004 | 95.0% |
| CESD-10 depression score | 0.064 | 0.004 | 94.0% |
| Smoking frequency | 0.056 | 0.004 | 92.5% |
| Male | 0.027 | 0.002 | 91.3% |
| Upper-body mobility | 0.075 | 0.007 | 91.1% |
| Couple household | 0.06 | 0.006 | 90.3% |
| Age | 0.056 | 0.007 | 86.9% |
| Drinking frequency | 0.036 | 0.006 | 83.7% |
| Received medical care | 0.03 | 0.005 | 83.2% |
| IADLs | 0.021 | 0.004 | 81.8% |
| Hospitalization times | 0.014 | 0.004 | 73.1% |
| OOP hospitalization expenditure | 0.016 | 0.004 | 72.7% |
| Lower-body mobility | 0.032 | 0.009 | 71.0% |
| Self-rated health | 0.019 | 0.006 | 70.8% |
| Rural residence | 0.022 | 0.01 | 57.4% |

Note: ASMD = average absolute standardized mean difference, calculated as the mean of pairwise comparisons across three exposure groups (low, medium, and high). All the covariates achieved excellent balance after overlap weighting (ASMD < 0.1). On the basis of 51 multiply imputed datasets (N = 5,274 per imputed dataset after excluding observations with missing propensity scores).

**Table S3.** DiD Estimates of the Time-Dose Effect on Chronic Condition Changes: MI vs. WCB.

| **Variables** | **Pooled MI**  **Coef. (SE)** | **WCB Corrected**  **Coef. (SE)** | **Pooled**  **p value** | **WCB**  **p value** |
| --- | --- | --- | --- | --- |
| A. Core policy and time interaction |  |  |  |  |
| TML: Medium (ref: Short) | -0.128 (0.086) | -0.128 (0.139) | 0.152 | 0.36 |
| TML: Long (ref: Short) | 1.323* (0.226) | 1.323 (0.621) | 0.000* | 0.033** |
| TimeMonths_c | 0.009 (0.008) | 0.009 (0.061) | 0.26 | 0.879 |
| TML: Medium × TimeMonths_c | -0.016 (0.016) | -0.016 (0.034) | 0.336 | 0.636 |
| TML: Long × TimeMonths_c | -0.325*** (0.046) | -0.325*** (0.116) | 0.000*** | 0.005*** |
| B. Health and demographic control variables |  |  |  |  |
| Chronic count | -0.205*** (0.015) | -0.205*** (0.018) | 0.000*** | 0.000*** |
| ADLs PC | 0.096*** (0.018) | 0.096*** (0.021) | 0.000*** | 0.000*** |
| Mental Health PC | 0.127*** (0.021) | 0.127*** (0.023) | 0.000*** | 0.000*** |
| Rural (1=Yes) | -0.230*** (0.052) | -0.230*** (0.061) | 0.000*** | 0.000*** |
| Age | -0.010*** (0.005) | -0.010* (0.005) | 0.052* | 0.070* |
| Male (1=Yes) | 0.058 (0.044) | 0.058 (0.048) | 0.199 | 0.227 |
| Low Education (1=Yes) | -0.029 (0.074) | -0.029 (0.081) | 0.699 | 0.721 |
| Couple household (1=Yes) | 0.082 (0.050) | 0.082 (0.057) | 0.112 | 0.146 |
| C. Social economy and provincial covariates |  |  |  |  |
| Insured (1=Yes) | 0.027 (0.072) | 0.027 (0.082) | 0.709 | 0.742 |
| Econ PC | -0.000(0.000) | -0.000(0.000) | 0.107 | 0.401 |
| Medical Status PC | -0.112 (0.125) | -0.112 (0.190) | 0.378 | 0.555 |
| Econ PC × Med PC | 0.000(0.000) | 0.000(0.000) | 0.13 | 0.451 |
| D. Health behavior and service utilization |  |  |  |  |
| Cares of ADLs (1=Yes) | 0.067 (0.073) | 0.067 (0.082) | 0.369 | 0.414 |
| Hospitalization times (past year) | 0.176*** (0.028) | 0.176*** (0.032) | 0.000*** | 0.000*** |
| Out-of-pocket hospitalization expenditure | 0.000(0.000) | 0.000(0.000)) | 0.555 | 0.671 |
| Smokes per day | -0.003 (0.003) | -0.003 (0.003) | 0.271 | 0.338 |
| Frequency of drinking per day (ref:Never) |  |  |  |  |
| 1. Less than one | -0.025 (0.060) | -0.025 (0.069) | 0.68 | 0.713 |
| 2. one | -0.077 (0.093) | -0.077 (0.107) | 0.417 | 0.474 |
| 3. two | -0.016 (0.082) | -0.016 (0.106) | 0.848 | 0.881 |
| 4. More than two | -0.062 (0.102) | -0.062 (0.116) | 0.549 | 0.591 |
| Constant | 1.715** (0.684) | 1.715* (1.039) | 0.019** | 0.099* |
| Model information |  |  |  |  |
| observes | 7,487 | 7,487 |  |  |
| Number of clusters (province) | 28 | 28 |  |  |
| Imputation times | 50 | 50 |  |  |
| Bootstrap repetitions | — | 10,000 |  |  |

Note:† the age_c p value of the pooled MI is displayed as the overall age_cat test result of the original output (p=0.821), but the single age_c coefficient is not clearly reported in the provided output. Here, the continuous age_c estimate from the WCB is used. *** p<0.01; ** p<0.05; * p<0.1.

SE=standard error; θ̄=WCB merge point estimation. WCB=wild cluster bootstrap.

Pooled Mi uses robust clustering standard errors (across 28 provinces).

The WCB method provides more conservative inference when there are fewer clustering units.

**Table S4.** Placebo Test Results (2011–2015): Continuous-Time DiD Estimates of the Pseudotime Dose Effect (MI vs. WCB).

| **Variables** | **Pooled MI**  **Coef. (SE)** | **WCB Corrected**  **Coef. (SE)** | **Pooled**  **p value** | **WCB**  **p value** |
| --- | --- | --- | --- | --- |
| A. Core policy and dose interaction |  |  |  |  |
| TML: Medium (ref: Short) | -0.001 (0.035) | -0.001(0.046) | 0.971 | 0.977 |
| TML: Long (ref: Short) | -0.273 (0.311) | -0.272 (0.592) | 0.389 | 0.645 |
| TimeMonths_c | -0.012*** (0.002) | -0.012** (0.006) | 0.000*** | 0.033** |
| TML: Medium × TimeMonths_c | 0.010 (0.017) | 0.010 (0.024) | 0.562 | 0.671 |
| TML: Long × TimeMonths_c | 0.089 (0.076) | 0.089 (0.124) | 0.254 | 0.474 |
| B. Health and demographic control variables |  |  |  |  |
| Chronic count | -0.003 (0.014) | -0.003 (0.016) | 0.817 | 0.831 |
| ADLs PC | 0.045 (0.022)* | 0.045 (0.024)* | 0.054* | 0.059* |
| Mental Health PC | 0.086*** (0.012) | 0.086*** (0.012) | 0.000*** | 0.000*** |
| Rural (1=Yes) | -0.131*** (0.046) | -0.131** (0.054) | 0.009*** | 0.015** |
| Age | -0.003 (0.002) | -0.003 (0.002) | 0.179 | 0.193 |
| Male (1=Yes) | 0.050 (0.028)* | 0.050 (0.032) | 0.088* | 0.122 |
| Low Education (1=Yes) | -0.040 (0.034) | -0.040 (0.036) | 0.248 | 0.264 |
| Couple household (1=Yes) | -0.102** (0.044) | -0.103** (0.049) | 0.028** | 0.039** |
| C. Social economy and provincial covariates |  |  |  |  |
| Insured (1=Yes) | 0.007 (0.059) | 0.007 (0.069) | 0.908 | 0.923 |
| Econ PC | -0.009 (0.014) | -0.009 (0.017) | 0.544 | 0.604 |
| Medical Status PC | 0.036 (0.026) | 0.036 (0.031) | 0.172 | 0.252 |
| Econ PC × Med PC | -0.003 (0.003) | -0.003 (0.005) | 0.287 | 0.52 |
| D. Health behavior and service utilization |  |  |  |  |
| Cares of ADLs (1=Yes) | 0.035 (0.068) | 0.035 (0.076) | 0.61 | 0.642 |
| Hospitalization times (past year) | 0.135* (0.043) | 0.135* (0.048) | 0.005* | 0.005*** |
| Out-of-pocket hospitalization expenditure | 0.000***(0.000) | 0.000***(0.000) | 0.002*** | 0.026** |
| Smokes per day | 0.000 (0.002) | 0.000 (0.003) | 0.976 | 0.982 |
| Frequency of drinking per day (ref:Never) |  |  |  |  |
| 1. Less than one | -0.039 (0.063) | -0.039 (0.071) | 0.541 | 0.58 |
| 2. one | -0.077 (0.071) | -0.077 (0.081) | 0.287 | 0.339 |
| 3. two | -0.194*** (0.063) | -0.194*** (0.074) | 0.006*** | 0.009*** |
| 4. More than two | -0.068 (0.102) | -0.068 (0.118) | 0.511 | 0.561 |
| Constant | 0.901*** (0.076) | 0.900*** (0.087) | 0.000*** | 0.000*** |
| Model information |  |  |  |  |
| observes | 6,614 | 6,614 |  |  |
| Number of clusters (province) | 28 | 28 |  |  |
| Imputation times | 30 | 30 |  |  |
| Bootstrap repetitions | — | 10,000 |  |  |

Note: *** p<0.01; ** p<0.05; * p<0.1

The 2011 baseline data (variables with "1" suffixes: synchronous_count_1, age11_c, etc.) were used during the placebo period. In the main analysis period, the TML long interaction item was significantly negative (β = -0.325, p = 0.005, WCB), whereas in the placebo period, it was not significantly positive (β = 0.089, p = 0.474). The directional reversal supported causal identification.

**Table S5.** DiD Estimates of the Time-Dose Effect on Height Changes: MI vs. WCB

| **Variables** | **Pooled MI**  **Coef. (SE)** | **WCB Corrected**  **Coef. (SE)** | **Pooled**  **p value** | **WCB**  **p value** |
| --- | --- | --- | --- | --- |
| A. Core policy and time interaction |  |  |  |  |
| TML: Medium (ref: Short) | -0.004 (0.009) | -0.004 (0.010) | 0.622 | 0.644 |
| TML: Long (ref: Short) | 0.051* (0.025) | 0.051* (0.030) | 0.052* | 0.093* |
| TimeMonths_c | 0.001 (0.001) | 0.001 (0.001) | 0.332 | 0.412 |
| TML: Medium × TimeMonths_c | 0.001 (0.003) | 0.001 (0.003) | 0.763 | 0.788 |
| TML: Long × TimeMonths_c | -0.008 (0.006) | -0.008 (0.006) | 0.149 | 0.203 |
|  |  |  |  |  |
| B. Health and demographic control variables |  |  |  |  |
| Chronic count | 0.001 (0.001) | 0.001 (0.001) | 0.168 | 0.235 |
| ADLs PC | -0.002 (0.001) | -0.002 (0.001) | 0.245 | 0.301 |
| Mental Health PC | -0.000 (0.001) | -0.000 (0.001) | 0.892 | 0.905 |
| Rural (1=Yes) | -0.022*** (0.003) | -0.022*** (0.004) | 0.000*** | 0.000*** |
| Age | -0.002*** (0.000) | -0.002*** (0.000) | 0.000*** | 0.000*** |
| Male (1=Yes) | 0.118*** (0.004) | 0.118*** (0.004) | 0.000*** | 0.000*** |
| Low Education (1=Yes) | -0.020*** (0.003) | -0.020*** (0.004) | 0.000*** | 0.000*** |
| Couple household (1=Yes) | 0.0068 (0.0042) | 0.0068 (0.0048) | 0.112 | 0.165 |
|  |  |  |  |  |
| C. Social economy and provincial covariates |  |  |  |  |
| Insured (1=Yes) | -0.002 (0.002) | -0.002 (0.003) | 0.372 | 0.445 |
| Econ PC | 0.000 (0.000) | 0.000 (0.000) | 0.739 | 0.774 |
| Medical Status PC | 0.001 (0.013) | 0.001 (0.015) | 0.968 | 0.975 |
| Econ PC × Med PC | 0.000 (0.000) | 0.000 (0.000) | 0.907 | 0.919 |
|  |  |  |  |  |
| D. Health behavior and service utilization |  |  |  |  |
| Cares of ADLs (1=Yes) | -0.002 (0.002) | -0.002 (0.002) | 0.396 | 0.467 |
| Hospitalization times (past year) | 0.001 (0.002) | 0.001 (0.002) | 0.567 | 0.629 |
| Out-of-pocket hospitalization expenditure | 0.000 (0.000) | 0.000 (0.000) | 0.052 | 0.083 |
| Smokes per day | 0.0001 (0.0001) | 0.0001 (0.0002) | 0.33 | 0.412 |
| Frequency of drinking per day (ref:Never) |  |  |  |  |
| 1. Less than one | -0.004 (0.005) | -0.004 (0.006) | 0.433 | 0.497 |
| 2. one | -0.005 (0.006) | -0.005(0.007) | 0.444 | 0.511 |
| 3. two | -0.005 (0.005) | -0.005 (0.005) | 0.322 | 0.391 |
| 4. More than two | -0.012** (0.005) | -0.000**(0.006) | 0.023** | 0.044** |
| Constant | 1.520*** (0.072) | 1.520*** (0.083) | 0.000*** | 0.000*** |
|  |  |  |  |  |
| Model information |  |  |  |  |
| Observations | 6,494 | 6,494 |  |  |
| Number of clusters (province) | 28 | 28 |  |  |
| Imputation times | 50 | 50 |  |  |
| Bootstrap repetitions | — | 10,000 |  |  |

Note: *** p<0.01; ** p<0.05; * p<0.1. SE = standard error; WCB = wild cluster bootstrap. Pooled MI uses a robust clustering standard error (clustering of 28 provinces). The WCB method provides more conservative inference when there are fewer clustering units.

**Table S6.** Heterogeneity of Policy Effects by Sociodemographic Characteristics.

| **Variables** | **p value** |
| --- | --- |
| Male × TimeMonths_c | p=0.45 |
| Rural × TimeMonths_c | p=0.31 |
| Lowedu × TimeMonths_c | p=0.28 |

**Table S7.** Correlation between policy implementation timing and baseline provincial characteristics across 28 provinces

| **Baseline Characteristic (2015)** | **Spearman ρ** | **p value** |
| --- | --- | --- |
| Mean chronic conditions count | 0.215 | 0.270 |
| Mean ADL limitations | -0.094 | 0.631 |
| Mean age (years) | −0.139 | 0.477 |
| Per capita GDP (CNY) | -0.004 | 0.982 |

Note: Individual-level data from the 2015 wave of the CHARLS were aggregated to the provincial level (N=28 provinces). The implementation month ranges from 3--21 months (relative to October 2016), with negative values indicating implementation prior to the national policy announcement. Spearman correlation coefficients were used because of the small sample size at the provincial level. None of the correlations reach statistical significance at the α=0.05 level, supporting the quasiexogeneity assumption that policy implementation timing is driven primarily by administrative factors (e.g., provincial legislative schedules and fiscal cycles) rather than by baseline health conditions or economic status.

**Table S8.** Timeline for provinces to implement Healthy China 2030.

| **Province** | **Policy Year** | **Policy**  **Month** | **Fieldwork**  **end year** | **Fieldwork**  **end month** | **Duration**  **(months)** | **Link** |
| --- | --- | --- | --- | --- | --- | --- |
| Anhui | 2017 | 8 | 2018 | 9 | 13 | https://wjw.ah.gov.cn/public/7001/56067541.html |
| Beijing | 2017 | 9 | 2018 | 9 | 12 | https://news.cri.cn/20170922/1e69 cc3d-d025-9049-dc56-bb17ddf05905.html |
| Chongqing | 2017 | 3 | 2018 | 9 | 18 | http://www.China.com.cn/news/2017-03/14/content_40454569.htm |
| Fujian | 2017 | 5 | 2018 | 9 | 16 | https://wjw.fujian.gov.cn/xxgk/fgwj/zcjd/szfzcjd/201706/t20170607_2378729.htm |
| Gansu | 2016 | 12 | 2018 | 9 | 21 | https://wsjk.gansu.gov.cn/wsjk/c113462/201703/1268502.shtml |
| Guangdong | 2017 | 9 | 2018 | 9 | 12 | https://wsjkw.gd.gov.cn/hdjl_zcjd/content/post_1944725.html |
| Guangxi | 2017 | 4 | 2018 | 9 | 17 | http://www.gxzf.gov.cn/html/xwfbhzt/tjjkgxjsxwfbh/bjzl_26626/t970433.shtml |
| Guizhou | 2018 | 12 | 2018 | 9 | -3 | https://mp.weixin.qq.com/s/F7fbJdi-dAc5s7_5DYCvDg |
| Hebei | 2017 | 1 | 2018 | 9 | 20 | https://mp.weixin.qq.com/s/EK6uRWp6EtV-0ZFlFDBiDA |
| Heilongjiang | 2017 | 1 | 2018 | 9 | 20 | https://www.qqhryxyfsdryy.org.cn/2018/1113/c3663a102564/page.htm |
| Henan | 2017 | 6 | 2018 | 9 | 15 | https://wsjkw.henan.gov.cn/2017/06-19/1280132.html |
| Hubei | 2017 | 8 | 2018 | 9 | 13 | https://news.sina.com.cn/o/2017-08-29/doc-ifykiurx2737711.shtml |
| Hunan | 2017 | 7 | 2018 | 9 | 14 | https://mp.weixin.qq.com/s/8zgfw0jZYXzYWqkg2Jd8Gw |
| Jiangsu | 2017 | 2 | 2018 | 9 | 19 | https://mp.weixin.qq.com/s/TfcqzU04TJGuIJLLZZFyyg |
| Jiangxi | 2017 | 6 | 2018 | 9 | 15 | https://mp.weixin.qq.com/s/xIbqXZ7kExVxgur36E2qgA |
| Jilin | 2017 | 8 | 2018 | 9 | 13 | https://mp.weixin.qq.com/s/Ys3NEaCMKrQlqpMN2G9N3Q |
| Liaoning | 2017 | 3 | 2018 | 9 | 18 | https://mp.weixin.qq.com/s/C5Cgo-ztSkySC1AU20ircQ |
| Neimenggu | 2017 | 11 | 2018 | 9 | 10 | https://mp.weixin.qq.com/s/O1RigdE1CHjfXnPOTw0R0Q |
| Qinghai | 2016 | 12 | 2018 | 9 | 21 | https://mp.weixin.qq.com/s/_itwCs11icGsjLTTQ2A6pw |
| Shaanxi | 2017 | 3 | 2018 | 9 | 18 | https://www.shaanxi.gov.cn/zfxxgk/zfgb/2020/d11q/202006/t20200618_1728514.html |
| Shandong | 2017 | 2 | 2018 | 9 | 19 | https://mp.weixin.qq.com/s/5 sazV2JAvmU22FhFzOz8uQ |
| Shanghai | 2017 | 3 | 2018 | 9 | 18 | https://mp.weixin.qq.com/s/7KWEzT6FoT3ELJWTm9TwNA |
| Shanxi | 2017 | 4 | 2018 | 9 | 17 | https://mp.weixin.qq.com/s/ZypinAYVtaJIR-1JbfQMtw |
| Sichuan | 2017 | 3 | 2018 | 9 | 18 | https://mp.weixin.qq.com/s/ONkPfUE2helRxDvdRrhjdA |
| Tianjin | 2016 | 12 | 2018 | 9 | 21 | https://mp.weixin.qq.com/s/3KVWrKGhQbdKZ702ssNlSw |
| Xinjiang | 2017 | 4 | 2018 | 9 | 17 | https://mp.weixin.qq.com/s/ObHi_t3dyVwsF4B0O9Se9g |
| Yunnan | 2017 | 8 | 2018 | 9 | 13 | https://hrss.yn.gov.cn/NewsView.aspx?nid=24238&cid=526&isZt=7 |
| Zhejiang | 2016 | 12 | 2018 | 9 | 21 | https://www.zj.gov.cn/art/2022/2/16/art_1229019366_2392910.html |

**Table S9.** Pooled MI DiD Estimates of the Time-Dose Effect on ADL Changes.

| **Variables** | **Pooled MI**  **Coef. (SE)** | **Pooled**  **p value** |
| --- | --- | --- |
| A. Core policy and time interaction |  |  |
| TML: Medium (ref: Short) | -0.007 (0.068) | 0.922 |
| TML: Long (ref: Short) | 0.112 (0.475) | 0.816 |
| TimeMonths_c | 0.007 (0.006) | 0.232 |
| TML: Medium × TimeMonths_c | -0.009 (0.015) | 0.56 |
| TML: Long × TimeMonths_c | -0.039 (0.102) | 0.705 |
| B. Health and demographic control variables |  |  |
| Chronic count | 0.041*** (0.010) | 0.000*** |
| ADLs PC | -0.231*** (0.021) | 0.000*** |
| Mental Health PC | 0.076*** (0.024) | 0.004*** |
| Rural (1=Yes) | 0.134*** (0.037) | 0.001*** |
| Age | 0.019*** (0.003) | 0.000*** |
| Male (1=Yes) | -0.064 (0.038) | 0.105 |
| Low Education (1=Yes) | 0.008 (0.038) | 0.845 |
| Couple household (1=Yes) | -0.015 (0.037) | 0.69 |
| C. Social economy and provincial covariates |  |  |
| Insured (1=Yes) | -0.031 (0.055) | 0.583 |
| Econ PC | <0.001 (<0.001) | 0.237 |
| Medical Status PC | 0.082 (0.108) | 0.457 |
| Econ PC × Med PC | -0.000018 (0.000013) | 0.174 |
| D. Health behavior and service utilization |  |  |
| Cares of ADLs (1=Yes) | 0.257*** (0.042) | 0.000*** |
| Hospitalization times (past year) | -0.025 (0.035) | 0.488 |
| Out-of-pocket hospitalization expenditure | 0.000(0.000) | 0.672 |
| Smokes per day | -0.002 (0.002) | 0.331 |
| Frequency of drinking per day (ref:Never) |  |  |
| 1. Less than one | -0.040 (0.054) | 0.465 |
| 2. one | -0.038 (0.056) | 0.5 |
| 3. two | 0.019 (0.069) | 0.78 |
| 4. More than two | 0.147 (0.096) | 0.138 |
| Constant | -0.352 (0.603) | 0.565 |
| Model information |  |  |
| observes | 7,487 |  |
| Number of clusters (province) | 28 |  |
| Imputation times | 50 |  |
| Bootstrap repetitions | — |  |

Note: *** p<0.01; ** p<0.05; * p<0.1.

Appendix II

**
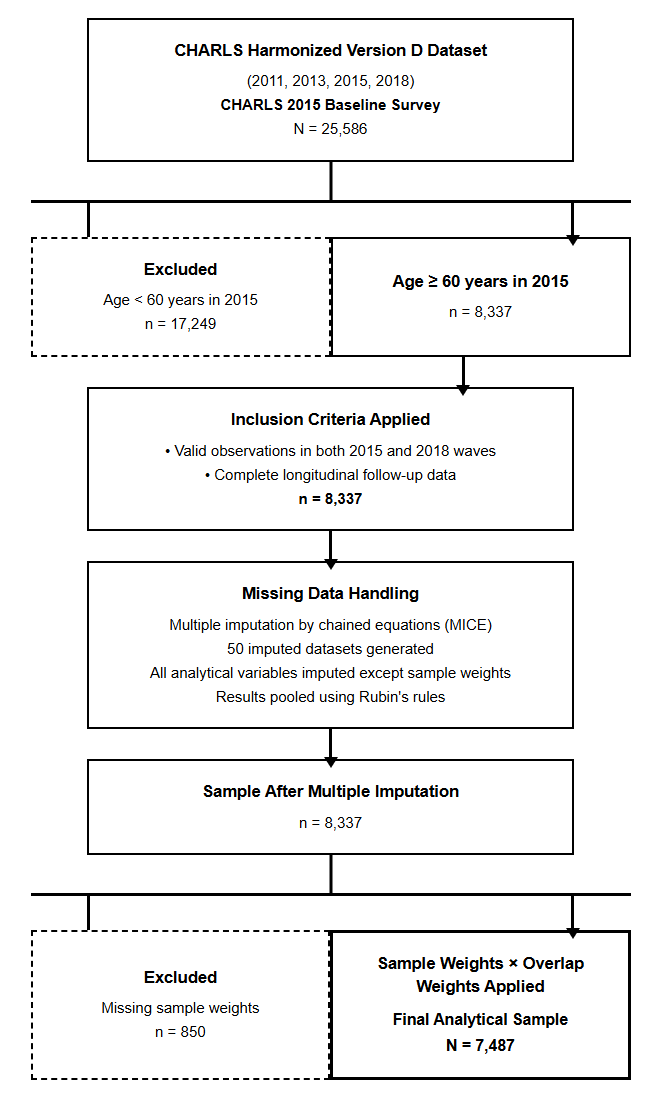
**

Note: CHARLS = China Health and Retirement Longitudinal Study; MICE = Multiple Imputation by Chained Equations. The sample selection was based on respondents aged ≥60 years in 2015 with complete longitudinal data from both the 2015 and 2018 waves. Multiple imputation was performed for all the analytical variables except the sample weights. Respondents with missing sample weights (n=850) were excluded when survey weights were applied in the final analytical models.

**Figure S1.** Flowchart of sample selection.





**Figure S2.** Visual assessment of covariate balance before and after overlap weighting.

Note: Dashed vertical lines at 0.1 indicate conventional thresholds for balance. The short dashed line at 0.05 indicates excellent balance. All covariates achieved excellent balance (SMD < 0.01) after weighting.
